# Supplementary material for: Genome-Wide Association Analysis of Active Accumulated Temperature versus Flowering Time in Soybean [Glycine max (L.) Merr.]
Source: MDPI journal article supplement (doi:10.3390/agronomy14040833), 2024-04-17
Supplement: s1 [file s1]

Table S1. List of 140 varieties in this study

| Entry no. | Cultivar name      | Region code <sup>1</sup> | Exp. grouping <sup>2</sup> | Mat. group <sup>3</sup> | Year <sup>4</sup> | Breeder / origin                  | Country     |
|-----------|--------------------|--------------------------|----------------------------|-------------------------|-------------------|-----------------------------------|-------------|
| 1         | CH22172 / OBELIX   | 2                        | 1                          | 000                     | 2014              | AGROSCOPE                         | Switzerland |
| 2         | CH21912 / PROTEIX  | 2                        | 1                          | 00                      | 2009              | AGROSCOPE                         | Switzerland |
| 3         | CH22138 / AMANDINE | 2                        | 1                          | 00                      | 2012              | AGROSCOPE                         | Switzerland |
| 4         | CH22177 / GALICE   | 2                        | 1                          | 00                      | 2015              | AGROSCOPE                         | Switzerland |
| 5         | CH22315 / MARQUISE | 2                        | 1                          | 00                      | 2016              | AGROSCOPE                         | Switzerland |
| 6         | CH21265 / ORION    | 2                        | 2                          | 0                       | 1998              | AGROSCOPE                         | Switzerland |
| 7         | CH22429            | 2                        | 2                          | 0                       | x                 | AGROSCOPE                         | Switzerland |
| 8         | CH22015 / CASTETIS | 2                        | 3                          | I                       | 2010              | AGROSCOPE                         | Switzerland |
| 9         | CH50111            | 2                        | 3                          | I                       | x                 | AGROSCOPE                         | Switzerland |
| 10        | CH50051 / PACO     | 2                        | 4                          | II                      | 2012              | AGROSCOPE                         | Switzerland |
| 11        | Atlanta            | 2                        | 1                          | 00                      | 2013              | Agroyoumis                        | Poland      |
| 12        | Mavka              | 2                        | 1                          | 000                     | 2013              | Agroyoumis                        | Poland      |
| 13        | ADA TD             | 2                        | 2                          | 0                       | 2005              | ARDS Turda                        | Romania     |
| 14        | CRISTINA TV        | 2                        | 2                          | 0                       | 2017              | ARDS Turda                        | Romania     |
| 15        | FELIX              | 2                        | 1                          | 00                      | 2016              | ARDS Turda                        | Romania     |
| 16        | MIRUNA             | 2                        | 1                          | 00                      | 2012              | ARDS Turda                        | Romania     |
| 17        | ERICA              | 2                        | 1                          | 000                     | 2017              | DANKO                             | Poland      |
| 18        | PEPITA             | 2                        | 2                          | 0                       | 2011              | ERSA                              | Italy       |
| 19        | AMMA               | 2                        | 3                          | I                       | 2016              | ERSA                              | Italy       |
| 20        | Ananda             | 2                        | 3                          | I                       | 2014              | ERSA                              | Italy       |
| 21        | BAHIA              | 2                        | 3                          | I                       | 2008              | ERSA                              | Italy       |
| 22        | Prana              | 2                        | 3                          | I                       | 2015              | ERSA                              | Italy       |
| 23        | ADONAI             | 2                        | 4                          | II                      | 2012              | ERSA                              | Italy       |
| 24        | Avatar             | 2                        | 4                          | II                      | 2018              | ERSA                              | Italy       |
| 25        | BLANCAS            | 2                        | 4                          | II                      | 2007              | ERSA                              | Italy       |
| 26        | Buenos             | 2                        | 4                          | II                      | 2011              | ERSA                              | Italy       |
| 27        | Guru               | 2                        | 4                          | II                      | 2018              | ERSA                              | Italy       |
| 28        | ES Senator         | 2                        | 1                          | 000                     | 2012              | Euralis / Lidea                   | France      |
| 29        | ES Gladiator       | 2                        | 2                          | 0                       | 2014              | Euralis / Lidea                   | France      |
| 30        | ES Tenor           | 2                        | 2                          | 0                       | 2015              | Euralis / Lidea                   | France      |
| 31        | ES Indicator       | 2                        | 3                          | I                       | 2017              | Euralis / Lidea                   | France      |
| 32        | ES Mediator        | 2                        | 4                          | II                      | 2015              | Euralis / Lidea                   | France      |
| 33        | GK MEDAL           | 2                        | 3                          | I                       | x                 | Gabonakutato                      | Hungary     |
| 34        | GK SPIRIT          | 2                        | 3                          | I                       | x                 | Gabonakutato                      | Hungary     |
| 35        | PANNONIA KINCSE    | 2                        | 3                          | I                       | 2008              | Gabonakutato                      | Hungary     |
| 36        | Khutorianochka     | 2                        | 1                          | 000                     | 2010              | IFRAP                             | Ukraine     |
| 37        | Oriana             | 2                        | 1                          | 000                     | 2002              | IFRAP                             | Ukraine     |
| 38        | TriDa              | 2                        | 1                          | 000                     | 2015              | IFRAP                             | Ukraine     |
| 39        | Vezha              | 2                        | 1                          | 000                     | 2010              | IFRAP                             | Ukraine     |
| 40        | NS Kaca            | 2                        | 1                          | 000                     | 2013              | IFVCNS                            | Serbia      |
| 41        | Favorit            | 2                        | 1                          | 00                      | 2010              | IFVCNS                            | Serbia      |
| 42        | Galina             | 2                        | 2                          | 0                       | 2006              | IFVCNS                            | Serbia      |
| 43        | NS Atlas           | 2                        | 2                          | 0                       | 2016              | IFVCNS                            | Serbia      |
| 44        | NS Maximus         | 2                        | 2                          | 0                       | 2011              | IFVCNS                            | Serbia      |
| 45        | NS Mercury         | 2                        | 2                          | 0                       | 2008              | IFVCNS                            | Serbia      |
| 46        | NS Princeza        | 2                        | 2                          | 0                       | 2013              | IFVCNS                            | Serbia      |
| 47        | Dongnong 53        | 1                        | 2                          | 0                       | 2008              | Northeast Agricultural University | China       |
| 48        | NS-L-201458        | 2                        | 2                          | 0                       | x                 | IFVCNS                            | Serbia      |
| 49        | NS-L-401088        | 2                        | 2                          | 0                       | x                 | IFVCNS                            | Serbia      |
| 50        | NS-L-401145        | 2                        | 2                          | 0                       | x                 | IFVCNS                            | Serbia      |
| 51        | NS-L-401156        | 2                        | 2                          | 0                       | x                 | IFVCNS                            | Serbia      |
| 52        | NS-L-401157        | 2                        | 2                          | 0                       | x                 | IFVCNS                            | Serbia      |
| 53        | NS-L-501012        | 2                        | 2                          | 0                       | x                 | IFVCNS                            | Serbia      |
| 54        | Tajfun             | 2                        | 2                          | 0                       | 2010              | IFVCNS                            | Serbia      |
| 55        | Valjevka           | 2                        | 2                          | 0                       | 2003              | IFVCNS                            | Serbia      |
| 56        | NS Fantast         | 2                        | 4                          | II                      | 2017              | IFVCNS                            | Serbia      |
| 57        | NS HOGAR           | 2                        | 3                          | I                       | 2013              | IFVCNS                            | Serbia      |
| 58        | NS Kraljica        | 2                        | 4                          | II                      | 2017              | IFVCNS                            | Serbia      |
| 59        | NS Zita            | 2                        | 4                          | II                      | 2013              | IFVCNS                            | Serbia      |
| 60        | Sava               | 2                        | 4                          | II                      | 2004              | IFVCNS                            | Serbia      |
| 61        | Trijumf            | 2                        | 4                          | II                      | 2009              | IFVCNS                            | Serbia      |
| 62        | Venera             | 2                        | 4                          | II                      | 2013              | IFVCNS                            | Serbia      |
| 63        | Ventis             | 2                        | 4                          | II                      | 2017              | IFVCNS                            | Serbia      |
| 64        | Victoria           | 2                        | 4                          | II                      | 2009              | IFVCNS                            | Serbia      |
| 65        | AUGUSTA            | 2                        | 1                          | 0000                    | 2002              | Poznan University of Life Sci.    | Poland      |
| 66        | Amadea             | 2                        | 1                          | 00                      | 2014              | Saatzucht Donau                   | Austria     |
| 67        | Antonia            | 2                        | 1                          | 00                      | 2015              | Saatzucht Donau                   | Austria     |
| 68        | Abelina            | 2                        | 1                          | 000                     | 2016              | Saatzucht Donau                   | Austria     |
| 69        | Albenga            | 2                        | 1                          | 00                      | 2016              | Saatzucht Donau                   | Austria     |
| 70        | Alexa              | 2                        | 1                          | 000                     | 2017              | Saatzucht Donau                   | Austria     |
| 71        | Ancona             | 2                        | 1                          | 000                     | 2015              | Saatzucht Donau                   | Austria     |
| 72        | Angelica           | 2                        | 1                          | 00                      | 2017              | Saatzucht Donau                   | Austria     |
| 73        | Regina             | 2                        | 1                          | 000                     | 2016              | Saatzucht Donau                   | Austria     |

|     |             |   |   |     |      |                                                                                  |         |
|-----|-------------|---|---|-----|------|----------------------------------------------------------------------------------|---------|
| 74  | Christine   | 2 | 1 | 00  | 2007 | Saatzucht Gleisdorf                                                              | Austria |
| 75  | GL Hermine  | 2 | 1 | 00  | 2010 | Saatzucht Gleisdorf                                                              | Austria |
| 76  | Josefine    | 2 | 1 | 00  | 2006 | Saatzucht Gleisdorf                                                              | Austria |
| 77  | SM SR17046  | 2 | 1 | 000 | x    | Freiherr von Moreau Saatzeit                                                     | Germany |
| 78  | SM SR16050  | 2 | 1 | 000 | x    | Freiherr von Moreau Saatzeit                                                     | Germany |
| 79  | Dongnong 54 | 1 | 2 | 0   | 2009 | Northeast Agricultural University                                                | China   |
| 80  | Dongnong 58 | 1 | 2 | 0   | 2012 | Northeast Agricultural University                                                | China   |
| 81  | Dongnong 50 | 1 | 2 | 0   | 2007 | Northeast Agricultural University                                                | China   |
| 82  | Dongnong 52 | 1 | 2 | 0   | 2008 | Northeast Agricultural University                                                | China   |
| 83  | Heihe 43    | 1 | 2 | 0   | 2007 | Heihe Branch of Heilongjiang Agricultural Sci.                                   | China   |
| 84  | Dongnong 51 | 1 | 2 | 0   | 2007 | Northeast Agricultural University                                                | China   |
| 85  | Heihe 45    | 1 | 1 | 00  | 2007 | Heihe Branch of Heilongjiang Agricultural Sci.                                   | China   |
| 86  | Heihe 44    | 1 | 1 | 000 | 2007 | Heihe Branch of Heilongjiang Agricultural Sci.                                   | China   |
| 87  | Dongnong 55 | 1 | 2 | 0   | 2009 | Northeast Agricultural University                                                | China   |
| 88  | Dengke 5    | 1 | 1 | 00  | 2012 | Hulun Buir Institution of Agricultural Sci.                                      | China   |
| 89  | Dengke 1    | 1 | 2 | 0   | 2009 | Hulun Buir Institution of Agricultural Sci.                                      | China   |
| 90  | Heihe 52    | 1 | 2 | 0   | 2010 | Heihe Branch of Heilongjiang Agricultural Sci.                                   | China   |
| 91  | Hefeng 51   | 1 | 3 | I   | 2006 | Jiamusi Branch of Heilongjiang Agricultural Sci.                                 | China   |
| 92  | Heihe 51    | 1 | 1 | 00  | 2009 | Heihe Branch of Heilongjiang Agricultural Sci.                                   | China   |
| 93  | Heihe 36    | 1 | 2 | 0   | 2004 | Heihe Branch of Heilongjiang Agricultural Sci.                                   | China   |
| 94  | Mengdou 30  | 1 | 2 | 0   | 2009 | Hulun Buir Institution of Agricultural Sci.                                      | China   |
| 95  | Heinong 69  | 1 | 3 | I   | 2012 | Soybean Institute of Heilongjiang Agricultural Sci.                              | China   |
| 96  | Heinong 64  | 1 | 3 | I   | 2010 | Soybean Institute of Heilongjiang Agricultural Sci.                              | China   |
| 97  | Jiyu 95     | 1 | 4 | III | 2008 | Institute of Soybean Research, Jilin Academy of Agricultural Sci.                | China   |
| 98  | Heinong 52  | 1 | 3 | I   | 2007 | Soybean Institute of Heilongjiang Agricultural Sci.                              | China   |
| 99  | Heinong 68  | 1 | 3 | I   | 2011 | Soybean Institute of Heilongjiang Agricultural Sci.                              | China   |
| 100 | Heinong 61  | 1 | 3 | I   | 2010 | Soybean Institute of Heilongjiang Agricultural Sci.                              | China   |
| 101 | Keshan 1    | 1 | 2 | 0   | 2009 | Keshan Branch of Heilongjiang Agricultural Sci.                                  | China   |
| 102 | Heinong 51  | 1 | 3 | I   | 2007 | Soybean Institute of Heilongjiang Agricultural Sci.                              | China   |
| 103 | Heihe 49    | 1 | 1 | 000 | 2008 | Heihe Branch of Heilongjiang Agricultural Sci.                                   | China   |
| 104 | Heihe 39    | 1 | 1 | 00  | 2006 | Heihe Branch of Heilongjiang Agricultural Sci.                                   | China   |
| 105 | Hefeng 35   | 1 | 3 | I   | 1994 | Jiamusi Branch of Heilongjiang Agricultural Sci.                                 | China   |
| 106 | Hefeng 48   | 1 | 3 | I   | 2005 | Jiamusi Branch of Heilongjiang Agricultural Sci.                                 | China   |
| 107 | Henong 61   | 1 | 3 | I   | 2010 | Jiamusi Branch of Heilongjiang Agricultural Sci.                                 | China   |
| 108 | Suinong 24  | 1 | 2 | 0   | 2007 | Suihua Branch of Heilongjiang Agricultural Sci.                                  | China   |
| 109 | Suinong 27  | 1 | 3 | I   | 2008 | Suihua Branch of Heilongjiang Agricultural Sci.                                  | China   |
| 110 | Suinong 22  | 1 | 4 | II  | 2005 | Suihua Branch of Heilongjiang Agricultural Sci.                                  | China   |
| 111 | Suinong 23  | 1 | 4 | II  | 2006 | Suihua Branch of Heilongjiang Agricultural Sci.                                  | China   |
| 112 | Suinong 26  | 1 | 4 | II  | 2008 | Suihua Branch of Heilongjiang Agricultural Sci.                                  | China   |
| 113 | Suinong 29  | 1 | 4 | II  | 2009 | Suihua Branch of Heilongjiang Agricultural Sci.                                  | China   |
| 114 | Suinong 32  | 1 | 4 | II  | 2011 | Suihua Branch of Heilongjiang Agricultural Sci.                                  | China   |
| 115 | Suinong 33  | 1 | 4 | II  | 2012 | Suihua Branch of Heilongjiang Agricultural Sci.                                  | China   |
| 116 | Suinong 34  | 1 | 4 | II  | 2012 | Suihua Branch of Heilongjiang Agricultural Sci.                                  | China   |
| 117 | Suinong 35  | 1 | 4 | II  | 2012 | Suihua Branch of Heilongjiang Agricultural Sci.                                  | China   |
| 118 | Henong 60   | 1 | 3 | I   | 2010 | Jiamusi Branch of Heilongjiang Agricultural Sci.                                 | China   |
| 119 | Hefeng 39   | 1 | 3 | I   | 2000 | Jiamusi Branch of Heilongjiang Agricultural Sci.                                 | China   |
| 120 | Henong 59   | 1 | 3 | I   | 2010 | Jiamusi Branch of Heilongjiang Agricultural Sci.                                 | China   |
| 121 | Hefeng 56   | 1 | 3 | I   | 2009 | Jiamusi Branch of Heilongjiang Agricultural Sci.                                 | China   |
| 122 | Hefeng 55   | 1 | 3 | I   | 2008 | Jiamusi Branch of Heilongjiang Agricultural Sci.                                 | China   |
| 123 | Hefeng 50   | 1 | 3 | I   | 2006 | Jiamusi Branch of Heilongjiang Agricultural Sci.                                 | China   |
| 124 | Henong 58   | 1 | 3 | I   | 2010 | Jiamusi Branch of Heilongjiang Agricultural Sci.                                 | China   |
| 125 | Henong 62   | 1 | 3 | I   | 2011 | Jiamusi Branch of Heilongjiang Agricultural Sci.                                 | China   |
| 126 | Hefeng 57   | 1 | 3 | I   | 2009 | Jiamusi Branch of Heilongjiang Agricultural Sci.                                 | China   |
| 127 | Kenong 36   | 1 | 3 | I   | 2009 | Kenfeng Seed                                                                     | China   |
| 128 | Kenbao 1    | 1 | 3 | I   | 2013 | Kenfeng Seed                                                                     | China   |
| 129 | Heinong 63  | 1 | 3 | I   | 2010 | Kenfeng Seed                                                                     | China   |
| 130 | Kenfeng 16  | 1 | 3 | I   | 2006 | Kenfeng Seed                                                                     | China   |
| 131 | Heihe 48    | 1 | 2 | 0   | 2007 | Kenfeng Seed                                                                     | China   |
| 132 | Heinong 53  | 1 | 3 | I   | 2007 | Kenfeng Seed                                                                     | China   |
| 133 | Hefeng 53   | 1 | 3 | I   | 2008 | Jiamusi Branch of Heilongjiang Agricultural Sci.                                 | China   |
| 134 | Fengshou 22 | 1 | 3 | I   | 1992 | Keshan Branch of Heilongjiang Agricultural Sci.                                  | China   |
| 135 | Fengshou 25 | 1 | 2 | 0   | 2007 | Keshan Branch of Heilongjiang Agricultural Sci.                                  | China   |
| 136 | Kenfeng 20  | 1 | 3 | I   | 2008 | Kenfeng Seed                                                                     | China   |
| 137 | Heihe 5     | 1 | 1 | 00  | 1986 | Heihe Branch of Heilongjiang Agricultural Sci.                                   | China   |
| 138 | Beifeng 16  | 1 | 2 | 0   | 2002 | Heilongjiang Land Reclamation Bureau Beian Institute of Agricultural Sci.        | China   |
| 139 | Kenfeng 17  | 1 | 3 | I   | 2007 | Kenfeng Seed                                                                     | China   |
| 140 | Beidou 30   | 1 | 2 | 0   | 2008 | Heilongjiang Land Reclamation Bureau Hongxinglong Institute of Agricultural Sci. | China   |

<sup>1</sup> Region code: 1=CN, 2= EU

<sup>2</sup> Experimental grouping: See Suppl. Table 2

<sup>3</sup> Soybean maturity group

<sup>4</sup> Year of cultivar release

Table S2. Environment code for experiment carried out in Europe in 2019

| Environment<br>code | Location | Latitude | Longitude | Year |
|---------------------|----------|----------|-----------|------|
| 1                   | Tulln    | 48.31946 | 16.06947  | 2019 |
| 2                   | Kühnham  | 48.4055  | 13.24921  | 2019 |
| 3                   | Nyon     | 46.39591 | 6.26113   | 2019 |
| 4                   | DLón     | 51.69199 | 17.07018  | 2019 |
| 5                   | Novi Sad | 45.33678 | 19.84092  | 2019 |

## Distribution of AAT

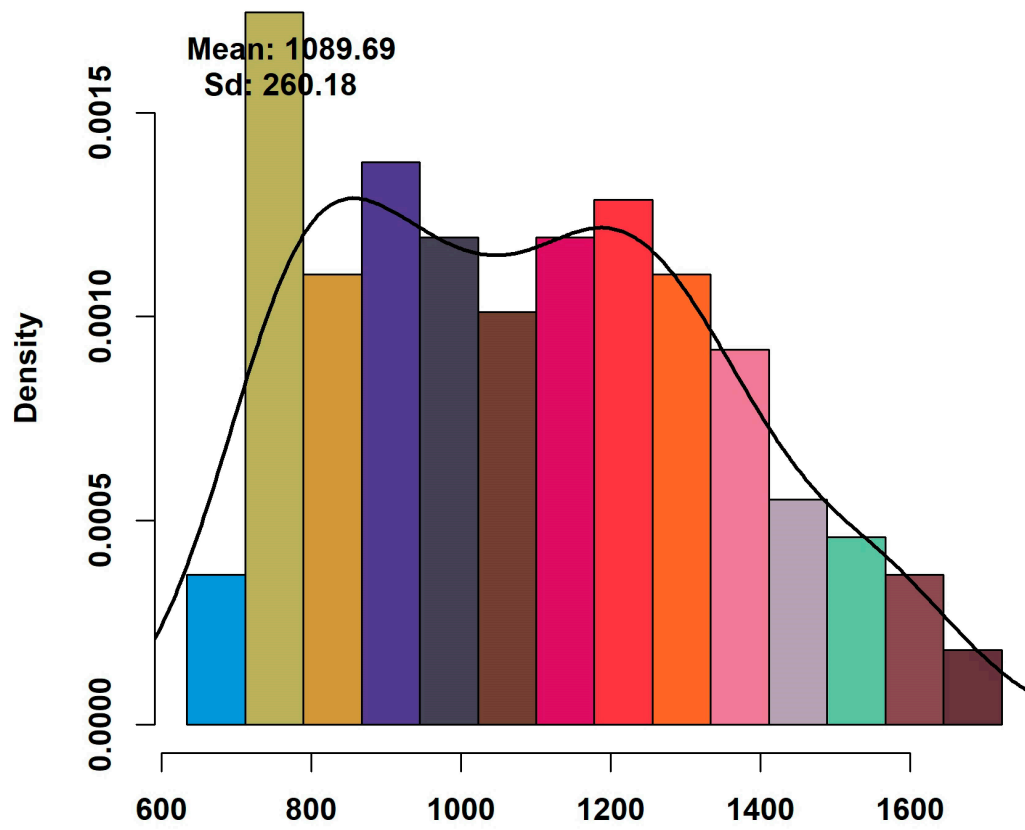

Figure S1. Distribution of AAT of time to flowering

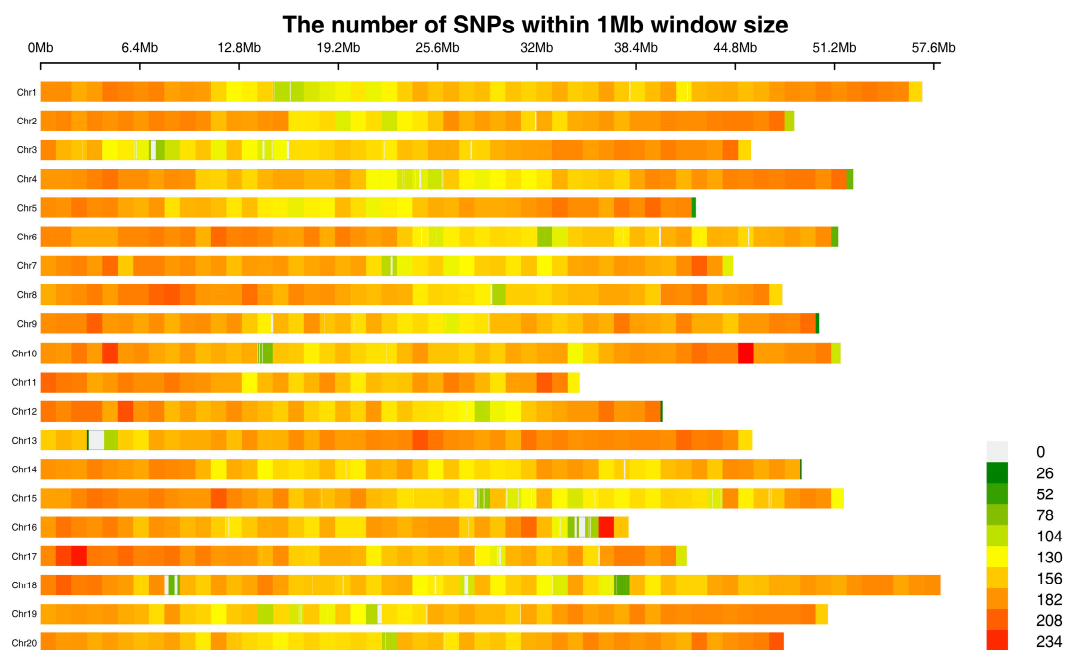

Figure S2. Dentist of SNPs passed quality control
